# Supplementary material
Source: PubMed Central journal article supplement (PMC5438294)

**Supplemental Figure S1. Double dissociation between places and tools within the medial ventral ROIs without Global signal regression.**

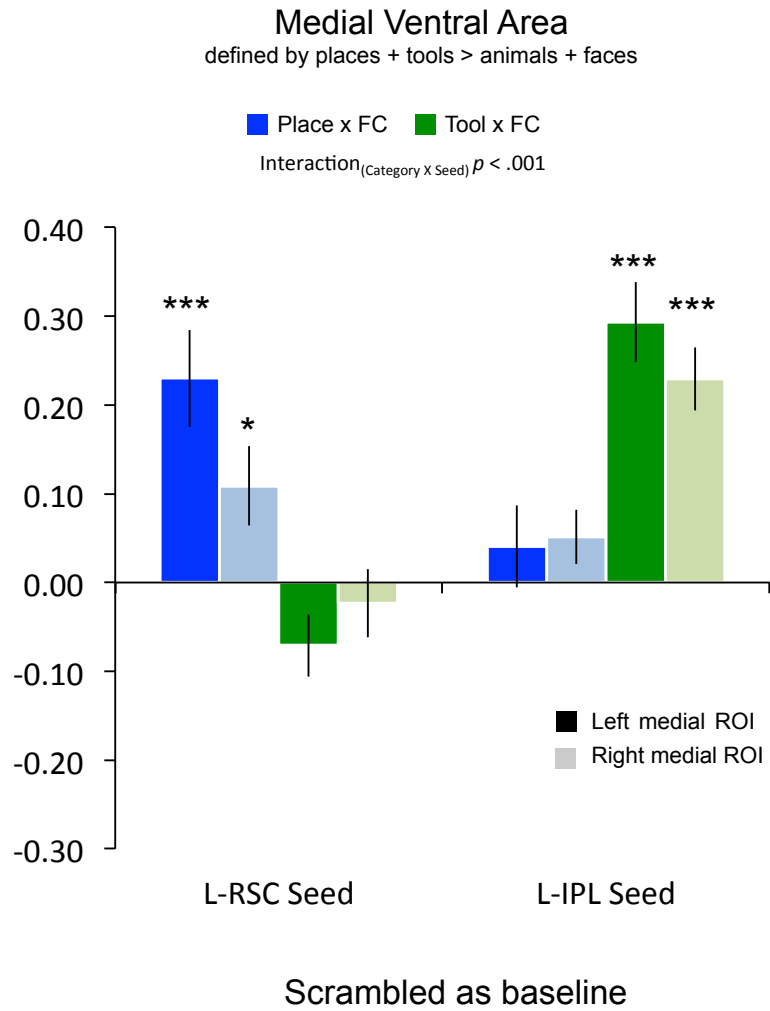

**Supplemental Figure S2. Searchlight analyses of voxel-wise correlation between stimulus preferences and functional connectivity to the L-RSC seed**

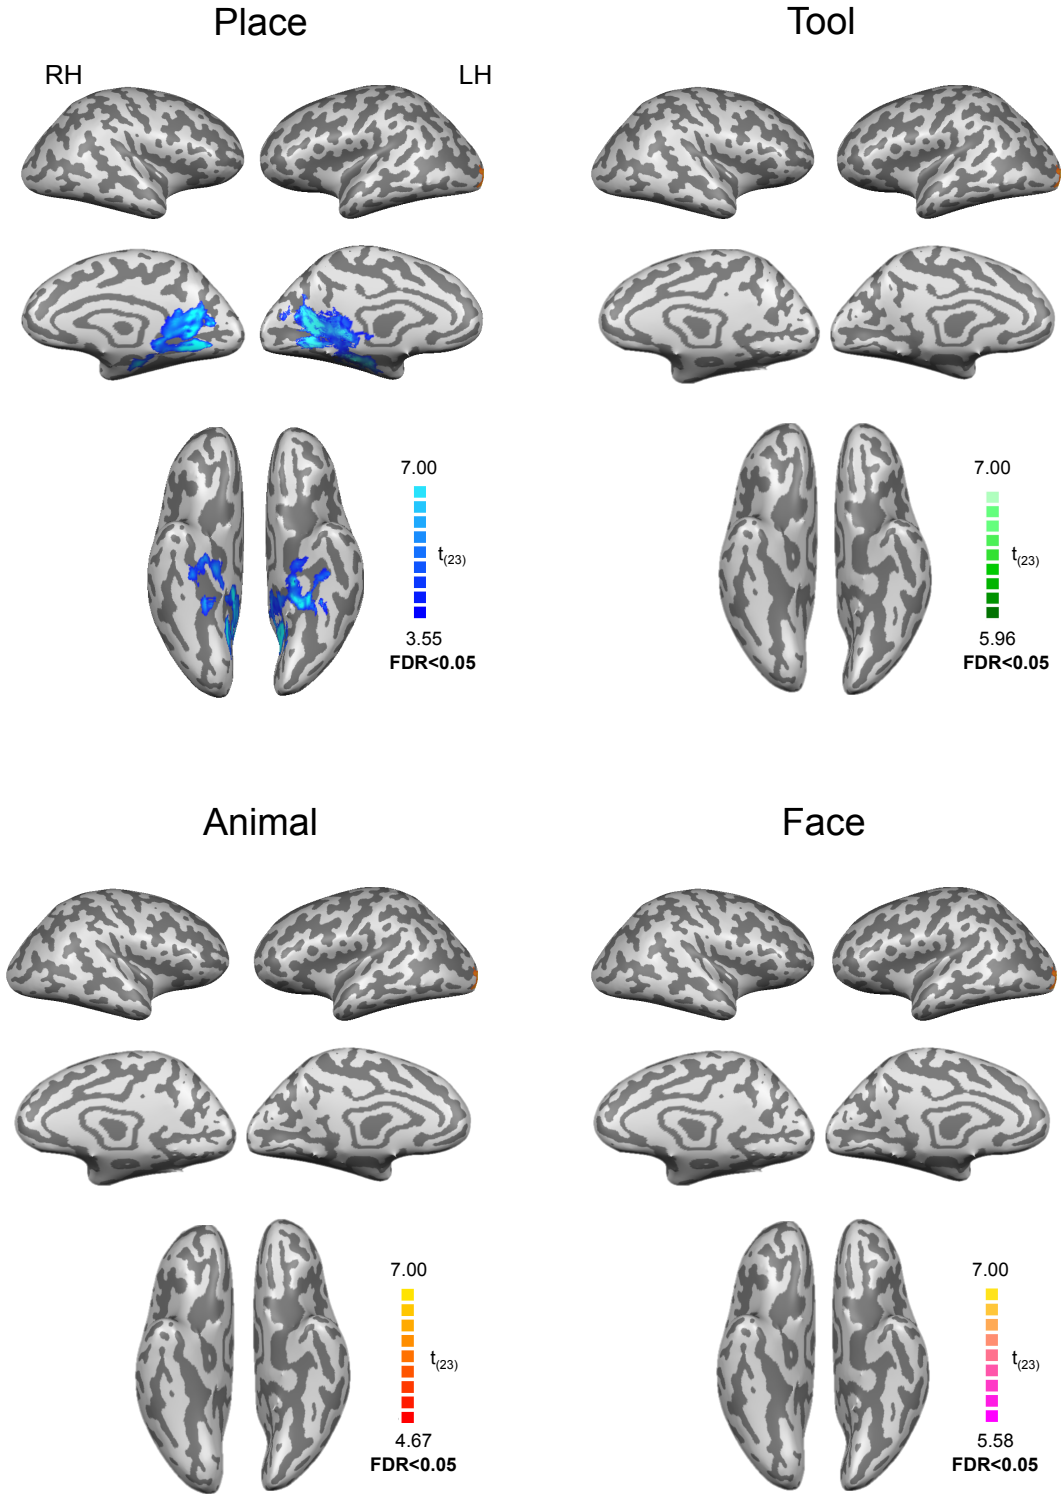

**Supplemental Figure S3. Searchlight analyses of voxel-wise correlation between stimulus preferences and functional connectivity to the L-IPL seed**

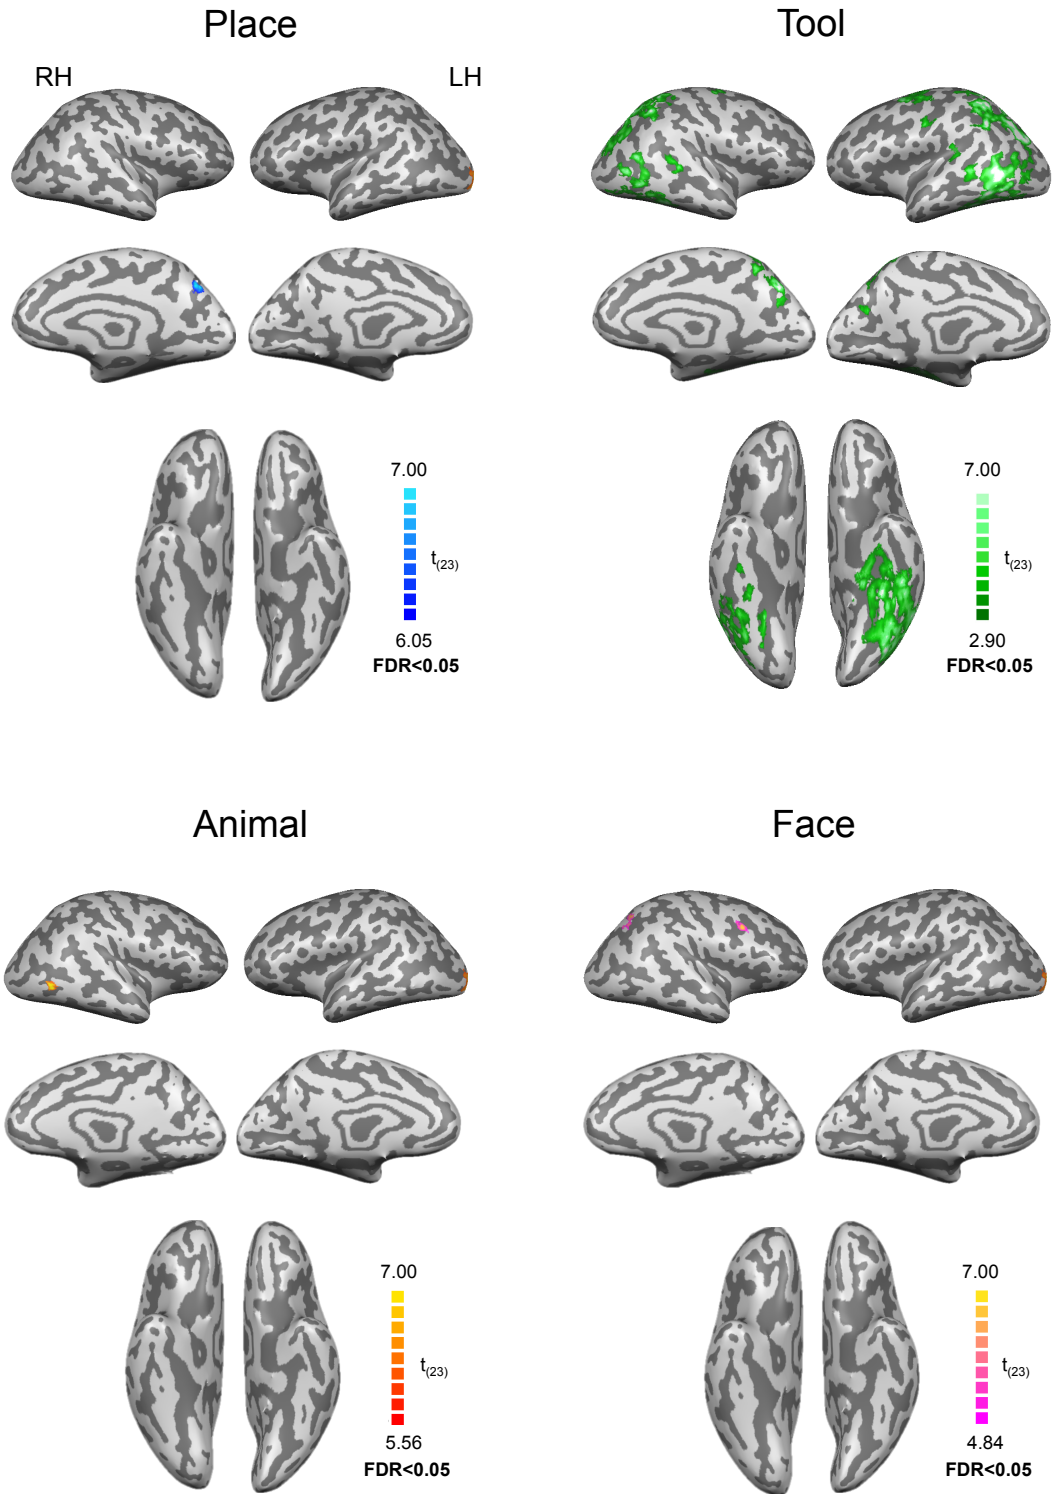

**Supplemental Figure S4. Searchlight analyses of voxel-wise correlation between stimulus preferences and functional connectivity to the R-STS seed**

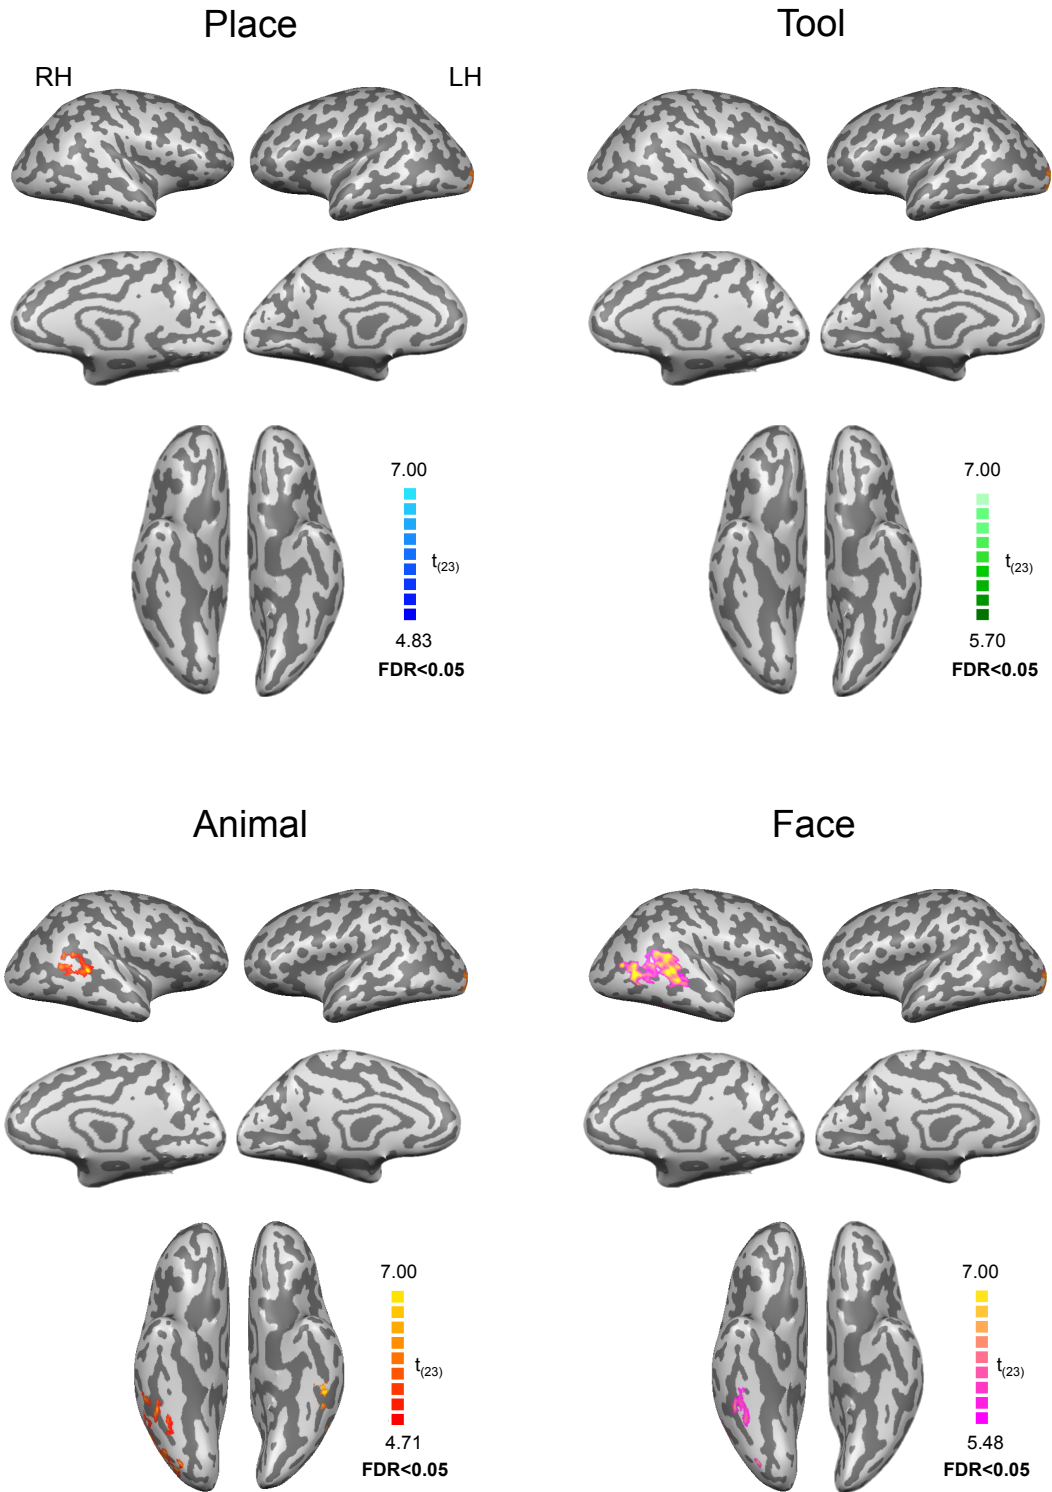

**Supplemental Figure S5. Double dissociation between places and tools is present when the minimum t value is held constant for the searchlight analyses.**

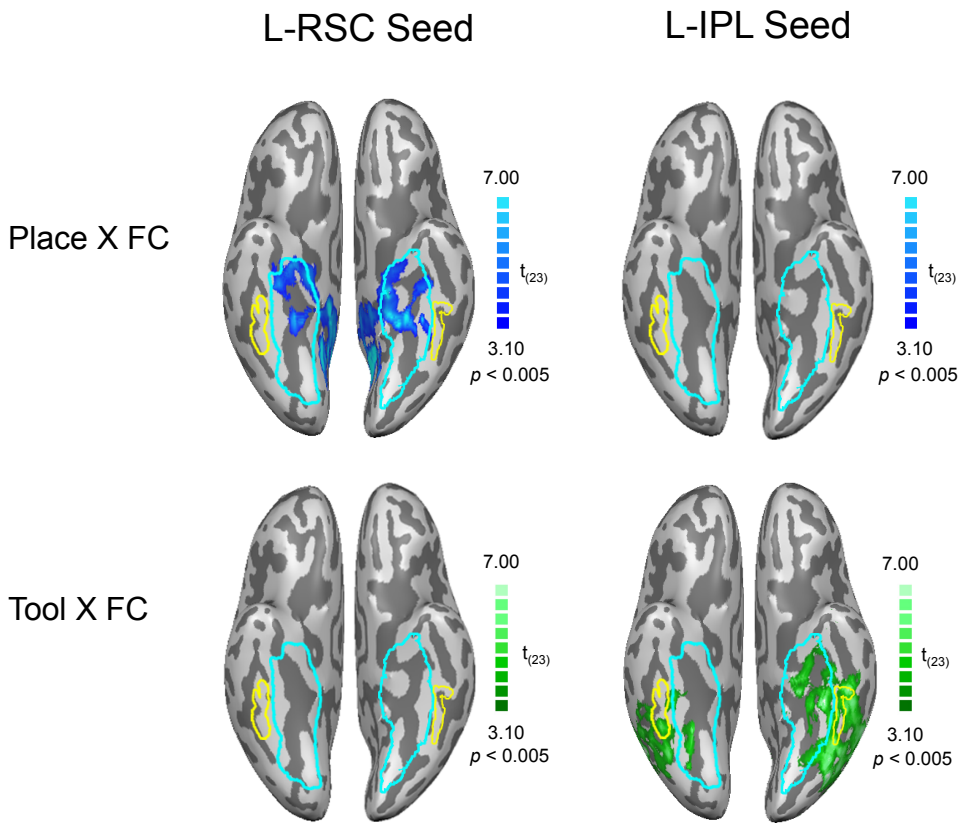

Supplement: NIHMS835798-supplement.pdf [file NIHMS835798-supplement.pdf]
